# Supplementary material for: Benign Breast Disease, NSAIDs, and Postmenopausal Breast Cancer Risk in the CPS-II Cohort
Source: Oxford University Press journal article supplement (doi:10.1158/1940-6207.capr-22-0403), 2023-01-03
Supplement: capr-22-0403_supplementary_table_s1_suppst1.docx [file capr-22-0403_supplementary_table_s1_suppst1.docx]

**Supplementary Table S1. Distributions of demographic and clinical characteristics by Ever NSAID use.**

| Characteristic | Total (N=60,366) | Never NSAID User (N=6,481) | Ever NSAID User (N=53,885) |
| --- | --- | --- | --- |
|  | Median (min-max) | Median (min-max) | Median (min-max) |
| Age at Baseline | 67 (45-91) | 69 (46-87) | 66 (45-91) |
| Age at 1992-93 Survey | 62 (40-87) | 65 (41-83) | 62 (40-87) |
|  | N (%) | N (%) | N (%) |
| BBD Status at Baseline |  |  |  |
| No | 44,577 (73.8) | 5,202 (80.3) | 39,375 (73.1) |
| Yes | 15,789 (26.2) | 1,279 (19.7) | 14,510 (26.9) |
| Race |  |  |  |
| White | 58,870 (97.5) | 6,211 (95.8) | 52,659 (97.7) |
| Black | 799 (1.3) | 150 (2.3) | 649 (1.2) |
| Other/Missing | 697 (1.2) | 120 (1.9) | 577 (1.1) |
| Weight Gain as an Adult at Baseline |  |  |  |
| >5 lbs lost | 7,713 (12.8) | 1,037 (16) | 6,676 (12.4) |
| -5 to 20 lbs gained | 14,111 (23.4) | 1,533 (23.7) | 12,578 (23.3) |
| 21-40 lbs gained | 16,836 (27.9) | 1,614 (24.9) | 15,222 (28.2) |
| 41-60 lbs gained | 9,802 (16.2) | 916 (14.1) | 8,886 (16.5) |
| 61+ lbs gained | 6,251 (10.4) | 614 (9.5) | 5,637 (10.5) |
| Missing/Unknown | 5,653 (9.4) | 767 (11.8) | 4,886 (9.1) |
| Highest Level of Education |  |  |  |
| Less than High School | 2,614 (4.3) | 518 (8) | 2,096 (3.9) |
| High School Grad | 18,846 (31.2) | 2,350 (36.3) | 16,496 (30.6) |
| Some College | 18,979 (31.4) | 1,866 (28.8) | 17,113 (31.8) |
| College Grad/Grad School | 19,530 (32.4) | 1,697 (26.2) | 17,833 (33.1) |
| Unknown | 397 (0.7) | 50 (0.8) | 347 (0.6) |
| Ever Oral Contraceptive Use |  |  |  |
| Never | 36,138 (59.9) | 4,611 (71.1) | 31,527 (58.5) |
| Ever | 23,531 (39) | 1,730 (26.7) | 21,801 (40.5) |
| Missing | 697 (1.2) | 140 (2.2) | 557 (1) |
| Smoking Status |  |  |  |
| Never | 33,869 (56.1) | 3,815 (58.9) | 30,054 (55.8) |
| Current | 3,247 (5.4) | 371 (5.7) | 2,876 (5.3) |
| Former | 23,218 (38.5) | 2,287 (35.3) | 20,931 (38.8) |
| Unknown | 32 (0.1) | 8 (0.1) | 24 (0) |
| Age at Menopause |  |  |  |
| <45 | 13,583 (22.5) | 1,442 (22.2) | 12,141 (22.5) |
| 45 - <50 | 14,566 (24.1) | 1,580 (24.4) | 12,986 (24.1) |
| 50 - <54 | 20,066 (33.2) | 2,220 (34.3) | 17,846 (33.1) |
| 54+ | 8,028 (13.3) | 875 (13.5) | 7,153 (13.3) |
| Missing | 4,123 (6.8) | 364 (5.6) | 3,759 (7) |
| Age at Menarche |  |  |  |
| <=12 | 26,977 (44.7) | 2,771 (42.8) | 24,206 (44.9) |
| 13 | 17,802 (29.5) | 1,789 (27.6) | 16,013 (29.7) |
| 13+ | 14,697 (24.3) | 1,779 (27.4) | 12,918 (24) |
| Missing | 890 (1.5) | 142 (2.2) | 748 (1.4) |
| Use of Hormone Replacements |  |  |  |
| Never User | 19,305 (32) | 2,703 (41.7) | 16,602 (30.8) |
| Current Est-only | 12,331 (20.4) | 1,011 (15.6) | 11,320 (21) |
| Former Est-only | 7,251 (12) | 998 (15.4) | 6,253 (11.6) |
| Former Est+Prog User | 2,934 (4.9) | 238 (3.7) | 2,696 (5) |
| Current Est+Prog User | 8,365 (13.9) | 490 (7.6) | 7,875 (14.6) |
| Other/Unknown | 10,180 (16.9) | 1,041 (16.1) | 9,139 (17) |
| Family History of Breast Cancer |  |  |  |
| No | 52,136 (86.4) | 5,623 (86.8) | 46,513 (86.3) |
| Yes | 8,230 (13.6) | 858 (13.2) | 7,372 (13.7) |
| Parity/Age at First Birth |  |  |  |
| Nulliparous | 4,430 (7.3) | 591 (9.1) | 3,839 (7.1) |
| 1-2 Births, Age <=24 | 9,515 (15.8) | 1,028 (15.9) | 8,487 (15.8) |
| 1-2 Births, Age 25-29 | 7,170 (11.9) | 838 (12.9) | 6,332 (11.8) |
| 1-2 Births, Age 30+ | 3,209 (5.3) | 402 (6.2) | 2,807 (5.2) |
| 3+ Births, Age <20 | 4,160 (6.9) | 433 (6.7) | 3,727 (6.9) |
| 3+ Births, Age 20-24 | 20,096 (33.3) | 1,867 (28.8) | 18,229 (33.8) |
| 3+ Births, Age 25-29 | 9,061 (15) | 935 (14.4) | 8,126 (15.1) |
| 3+ Births, Age 30+ | 1,328 (2.2) | 179 (2.8) | 1,149 (2.1) |
| Missing | 1,397 (2.3) | 208 (3.2) | 1,189 (2.2) |
| Recent Mammogram |  |  |  |
| No | 7,452 (12.3) | 1,284 (19.8) | 6,168 (11.4) |
| Yes | 52,914 (87.7) | 5,197 (80.2) | 47,717 (88.6) |
| History of Hypertension |  |  |  |
| No | 35,827 (59.3) | 3,738 (57.7) | 32,089 (59.6) |
| Yes | 24,539 (40.7) | 2,743 (42.3) | 21,796 (40.4) |
| History of Diabetes |  |  |  |
| No | 55,870 (92.6) | 5,862 (90.4) | 50,008 (92.8) |
| Yes | 4,496 (7.4) | 619 (9.6) | 3,877 (7.2) |
| History of Cardiovascular Disease |  |  |  |
| No | 53,679 (88.9) | 5,498 (84.8) | 48,181 (89.4) |
| Yes | 6,687 (11.1) | 983 (15.2) | 5,704 (10.6) |
| Weekly MET-hours of Activity |  |  |  |
| <3.5 METs | 8,059 (13.4) | 1,129 (17.4) | 6,930 (12.9) |
| 3.5 - <4.5 METs | 6,163 (10.2) | 637 (9.8) | 5,526 (10.3) |
| 4.5 - <14 METs | 19,737 (32.7) | 1,935 (29.9) | 17,802 (33) |
| 14 - <21.5 METs | 14,563 (24.1) | 1,432 (22.1) | 13,131 (24.4) |
| 21.5+ METs | 7,774 (12.9) | 740 (11.4) | 7,034 (13.1) |
| Unknown | 4,070 (6.7) | 608 (9.4) | 3,462 (6.4) |
| Alcohol Servings per Day |  |  |  |
| None | 30,717 (50.9) | 4,029 (62.2) | 26,688 (49.5) |
| <1 | 23,020 (38.1) | 1,787 (27.6) | 21,233 (39.4) |
| 1 | 4,517 (7.5) | 372 (5.7) | 4,145 (7.7) |
| 2+ | 1,124 (1.9) | 120 (1.9) | 1,004 (1.9) |
| Missing | 988 (1.6) | 173 (2.7) | 815 (1.5) |

Est, estrogen; prog, progesterone; METs, metabolic equivalent of task.
